# Supplementary material for: Correction and new understanding of the reactivity of illuminated tungsten trioxide in the dark: antecedents and consequences of photo-storage electrons triggering Fenton reactions
Source: Royal Society of Chemistry journal article supplement (doi:10.1039/d3ta07689j), 2024-01-01
Supplement: d3ta07689j1.pdf [file d3ta07689j1.pdf]

1

## Supplementary Material

2

for

3

**Correction and new understanding of reactivity for illuminated**

4

**tungsten trioxide under dark: Antecedents and consequences of**

5

**photo-storage electrons triggering Fenton reactions**

6

Hao Huang, Hui-Long Wang\*, Wen-Feng Jiang\*

7

*School of Chemistry, Dalian University of Technology, Dalian 116023, China*

8

9

10

11

12 Corresponding author: [hlwang@dlut.edu.cn](mailto:hlwang@dlut.edu.cn) (H.-L. Wang)

13 [dlutjiangwf@163.com](mailto:dlutjiangwf@163.com) (W.-F. Jiang)

14

15

16

17

18 Number of pages: 16

19 Number of figures: 11

20 Number of tables: 3

## Contents

|    |                                                                                                                                     |             |
|----|-------------------------------------------------------------------------------------------------------------------------------------|-------------|
| 21 |                                                                                                                                     |             |
| 22 | <b>1. Experimental procedure</b> .....                                                                                              | <b>-3-</b>  |
| 23 | <b>Text S 1.1.</b> Quantitative experiments on stored electrons in LP-t min samples .....                                           | <b>-3-</b>  |
| 24 | <b>Text S 1.2.</b> The oxidation experiments of I <sup>-</sup> for different catalysts.....                                         | <b>-3-</b>  |
| 25 | <b>Text S 1.3.</b> Theoretical calculation details .....                                                                            | <b>-4-</b>  |
| 26 | <b>2. Results and Discussion</b> .....                                                                                              | <b>-5-</b>  |
| 27 | <b>Figure S1.</b> SEM image of h-WO <sub>3</sub> •0.46H <sub>2</sub> O .....                                                        | <b>-5-</b>  |
| 28 | <b>Figure S2.</b> The refined crystal structure unit of h-WO <sub>3</sub> •0.46H <sub>2</sub> O .....                               | <b>-6-</b>  |
| 29 | <b>Figure S3.</b> Photographs of different illuminated h-WO <sub>3</sub> •0.46H <sub>2</sub> O samples.....                         | <b>-6-</b>  |
| 30 | <b>Figure S4.</b> Reflectance of different illuminated h-WO <sub>3</sub> •0.46H <sub>2</sub> O samples.....                         | <b>-6-</b>  |
| 31 | <b>Figure S5.</b> Reflectance of different illuminated h-WO <sub>3</sub> •0.46H <sub>2</sub> O samples.....                         | <b>-7-</b>  |
| 32 | <b>Figure S6.</b> UV–vis spectra and standard curves of KMnO <sub>4</sub> solution. ....                                            | <b>-7-</b>  |
| 33 | <b>Figure S7.</b> Schematic representation of the reduction process of MnO <sub>4</sub> <sup>-</sup> . ....                         | <b>-7-</b>  |
| 34 | <b>Figure S8.</b> TOC removal for DNBP degradation by different reaction systems ...                                                | <b>-8-</b>  |
| 35 | <b>Figure S9.</b> The TOC removal and trapping experiments of reactive species through                                              |             |
| 36 | DNBP degradation process for LP-80 min through different cycle times .....                                                          | <b>-8-</b>  |
| 37 | <b>Figure S10.</b> XRD pattern of the sample before and after DFR process .....                                                     | <b>-9-</b>  |
| 38 | <b>Figure S11.</b> Mass spectra (MS) of intermediates during the DFR process .....                                                  | <b>-10-</b> |
| 39 | <b>Table S1.</b> Different round-the-clock photocatalysts based on stored electrons in WO <sub>3</sub>                              |             |
| 40 | for organic contaminants degradation under dark condition. ....                                                                     | <b>-12-</b> |
| 41 | <b>Table S2.</b> Results of the refinement data of h-WO <sub>3</sub> •0.46H <sub>2</sub> O in the Space Group                       |             |
| 42 | <i>P6/mmm</i> . ....                                                                                                                | <b>-13-</b> |
| 43 | <b>Table S3.</b> Intermediates of DNBP in illuminated h-WO <sub>3</sub> •0.46H <sub>2</sub> O/H <sub>2</sub> O <sub>2</sub> system- | <b>13-</b>  |
| 44 | <b>2. Reference</b> .....                                                                                                           | <b>-15-</b> |
| 45 |                                                                                                                                     |             |
| 46 |                                                                                                                                     |             |
| 47 |                                                                                                                                     |             |
| 48 |                                                                                                                                     |             |
| 49 |                                                                                                                                     |             |

## 50 1. Experimental Procedures

### 51 1.1. Quantitative experiments on stored electrons in LP-t min 52 samples.

53  $\text{KMnO}_4$  as a selective probe reagent for the stored electrons (W(V)) trapping through  
54 Eq. (1) or (2):

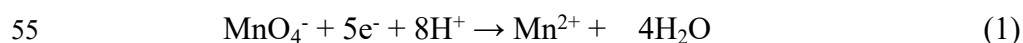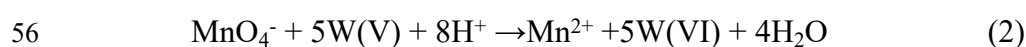

57 Firstly,  $\text{KMnO}_4$  solution with different concentrations (5, 50, 100, 120, 150, 200 ppm)  
58 were prepared at pH of 1 (The solvent was the 0.05 M/L  $\text{H}_2\text{SO}_4$  solution). Then, the  
59 reduction experiments of  $\text{KMnO}_4$  were carried out following certain steps: 20 mg of  
60 LP-t min was added into 30 ml  $\text{KMnO}_4$  solution with certain concentration under  
61 stirring conditions in dark. After 2 h, 3 mL of suspension were withdrawn, centrifuged  
62 and the supernatant was analyzed for evolution in concentration of  $\text{KMnO}_4$   
63 spectrophotometrically at  $\lambda_{max}$  of 525 nm. Finally, based on the consumption amount of  
64  $\text{KMnO}_4$ , the content (mmol/g) of W(V) in LP-t min sample is calculated to obtain the  
65 concentration (mmol/g) of stored electrons in the catalyst.

### 66 1.2. The oxidation experiments of I<sup>-</sup> for different catalysts.

67  $\text{I}_3^-$  as a selective probe reagent for existence of reactive oxygen species ( $\text{H}_2\text{O}_2$ ,  $\bullet\text{OH}$ ,  
68  $\bullet\text{O}_2^-$ ,  $\text{O}_2$ ) through Eq. (3) and (4)

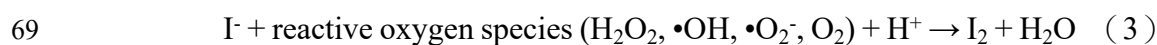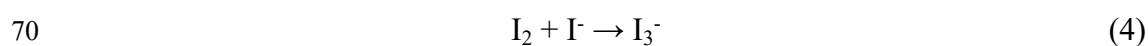

71 150  $\mu\text{L}$  of 10 wt. %  $\text{H}_2\text{O}_2$  was poured into 30 ml deionized water under magnetic  
72 stirring. After 10 min, 30 mg catalyst was added into above solution. After 1 h of  
73 continuous stirring, 5 mL of suspension were withdrawn, centrifuged and the  
74 supernatant was obtained. Subsequently, 10  $\mu\text{L}$  of  $(\text{NH}_4)_2\text{MoO}_4$  solution with  
75 concentration of 10  $\mu\text{M/L}$  and 0.5 ml of KI solution with concentration of 100 mM/L  
76 were added into the supernatant. The solution was stirred for 5 minutes and then  
77 analyzed for evolution in concentration of  $\text{I}_3^-$  spectrophotometrically at  $\lambda$  ( $\lambda_1 = 287$  nm,  
78  $\lambda_2 = 350$  nm).

### 79 **1.3. Theoretical calculation details.**

80 In this work, the adsorption process of  $\text{H}_2\text{O}_2$  on the (001) surface of h- $\text{WO}_3$  hydrate  
81 were studied in the CASTEP module. The Perdew-Burke-Ernzerhof (PBE) functional  
82 based on the generalized-gradient approximation (GGA) was used to described the  
83 exchange and correlation interactions between atoms. The cutoff energy of the plane  
84 wave was 300 eV and the tolerance for accepting convergence of the total energy per  
85 atom was  $10^{-5}$  eV atom $^{-1}$ . Moreover, the Brillouin zone was sampled using a suitable  
86  $\Gamma$  point. The adsorption binding energy  $E_{ads}$  was calculated according to Eq. (5).

$$87 \quad E_{ads} = E_{total} - E_{adsorbate} - E_{adsorbent} \quad (5)$$

88 where  $E_{total}$ ,  $E_{adsorbate}$  and  $E_{adsorbent}$  correspond to the total energies of the system,  
89 antibiotics, and adsorbents, respectively.

90 Molecular dynamics (MD) simulations were used to study the adsorption behavior of  
91  $\text{H}_2\text{O}_2$  molecule on the (001) surface of h- $\text{WO}_3$  hydrate. The computational model was  
92 composed by the h- $\text{WO}_3$  hydrate ( $3 \times 3$ ) super cell,  $\text{H}_2\text{O}_2$  solution slab and vacuum slab

93 (30 Å). Before calculation, the constructed system was geometrically optimized. The  
94 condensed phases were simulated using the force field UNIVERSAL. The Ewald  
95 summation technique was used to set bonded and unbonded terms as atom-based  
96 summations. The Nasal thermostat was used to perform constant temperature molecular  
97 dynamics simulations at  $298 \pm 10$  K with a time step of 1.0 fs and a simulation time of  
98 1000 ps.

99 Quantum chemical calculations were performed using Gaussian 09 program with DFT  
100 algorithm to optimize the structure of DNBP at the B3LYP/6-31G (d, p) level. The  
101 wave function analysis was carried out using the Multiwfn program to obtain the  
102 frontier molecular orbitals (the highest occupied molecular orbits (HOMO), the lowest  
103 unoccupied molecular orbits (LUMO), surface electrostatic potential (ESP)) and Fukui  
104 indices of DNBP molecule.

## 105 **2. Results and Discussion**

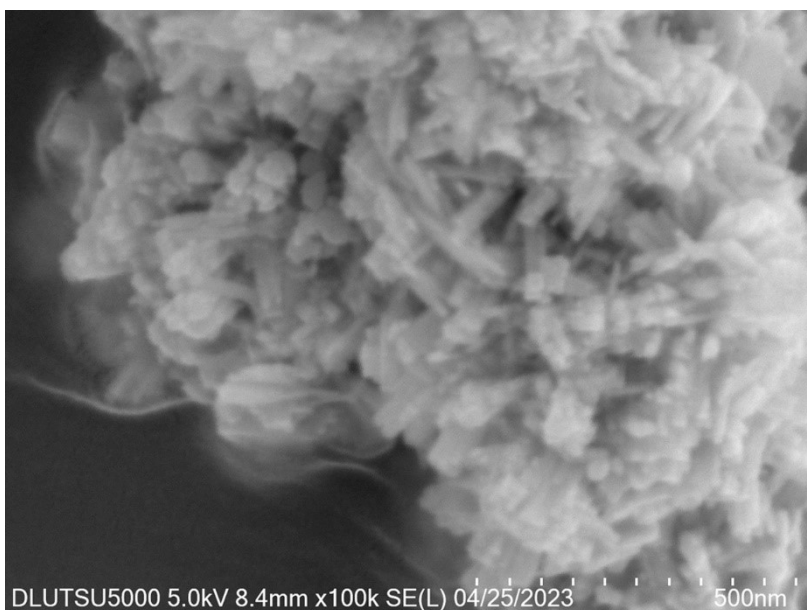

106  
107 **Figure S1.** SEM image of  $h\text{-WO}_3 \cdot 0.46\text{H}_2\text{O}$ .

108

109

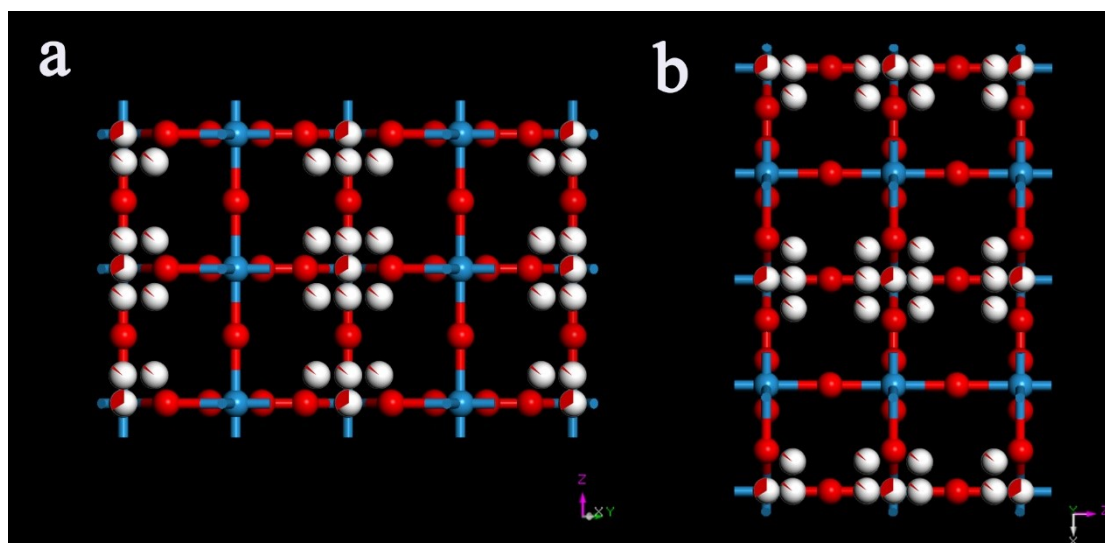

110

111 **Figure S2.** The refined crystal structure unit of  $h\text{-WO}_3\cdot 0.46\text{H}_2\text{O}$  viewed toward (a)  $yz$   
112 plane and (b)  $xz$  plane.

113

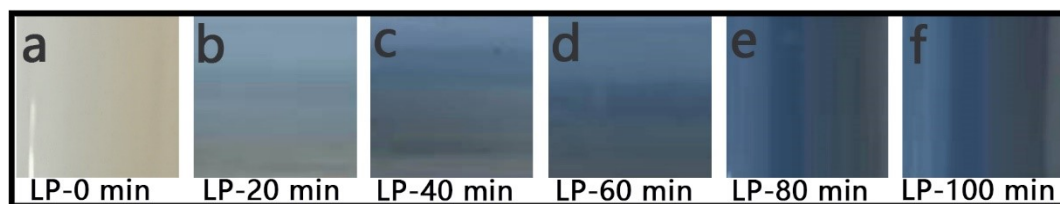

114

115 **Figure S3.** Optical photographs of different illuminated  $h\text{-WO}_3\cdot 0.46\text{H}_2\text{O}$  samples.

116

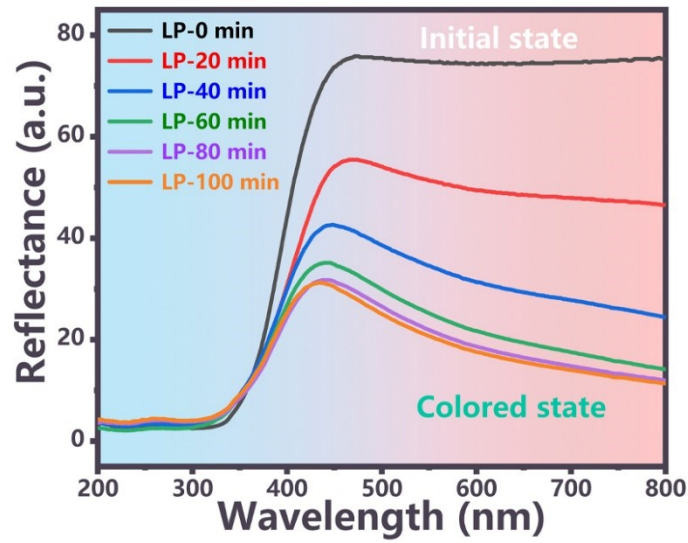

117

118 **Figure S4.** Reflectance spectra of different illuminated  $h\text{-WO}_3\cdot 0.46\text{H}_2\text{O}$  samples.

119

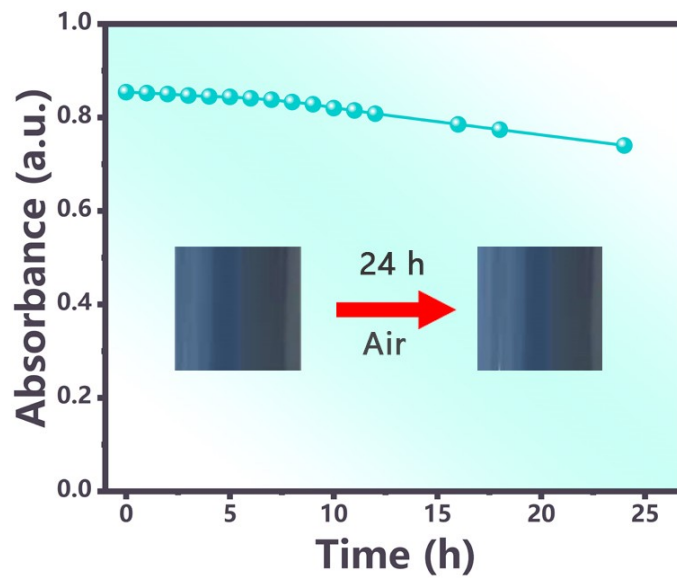

120

121 **Figure S5.** Reflectance spectra of different illuminated  $h\text{-WO}_3\cdot 0.46\text{H}_2\text{O}$  samples.

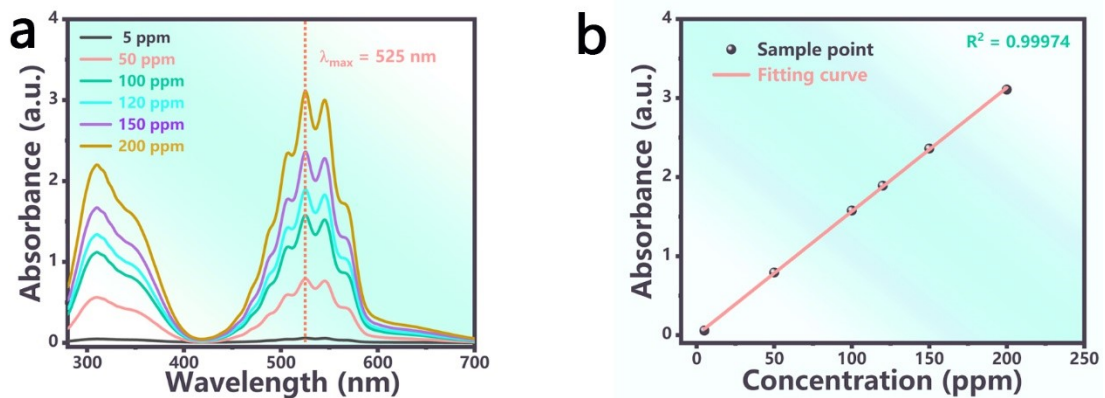

122

123 **Figure S6.** (a) UV-vis absorbance spectra of  $\text{KMnO}_4$  solution with different  
 124 concentration and (b) standard curve based on the absorbance at  $\lambda_{max} = 525 \text{ nm}$ .

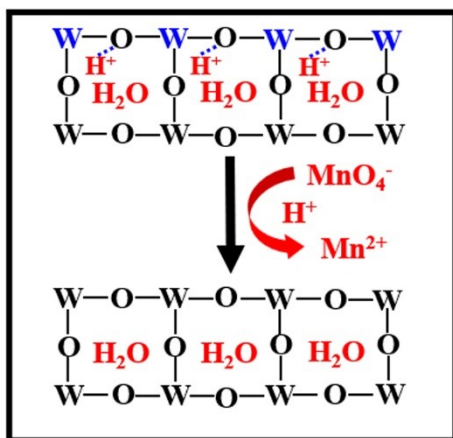

125  
 126 **Figure S7.** Schematic representation of the reduction process of  $\text{MnO}_4^-$  among  
 127 illuminated  $\text{h-WO}_3 \cdot 0.46\text{H}_2\text{O}$ .

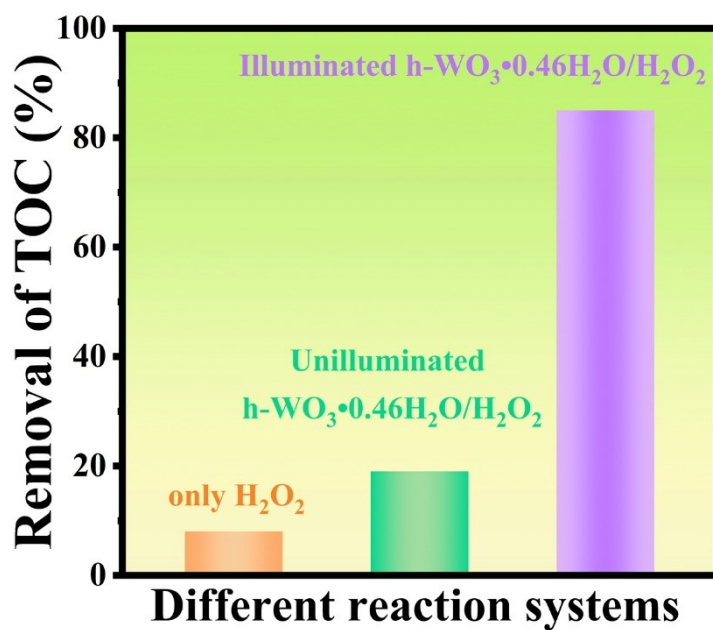

128  
 129 **Figure S8.** TOC removal for DNB degradation by different reaction systems.

130



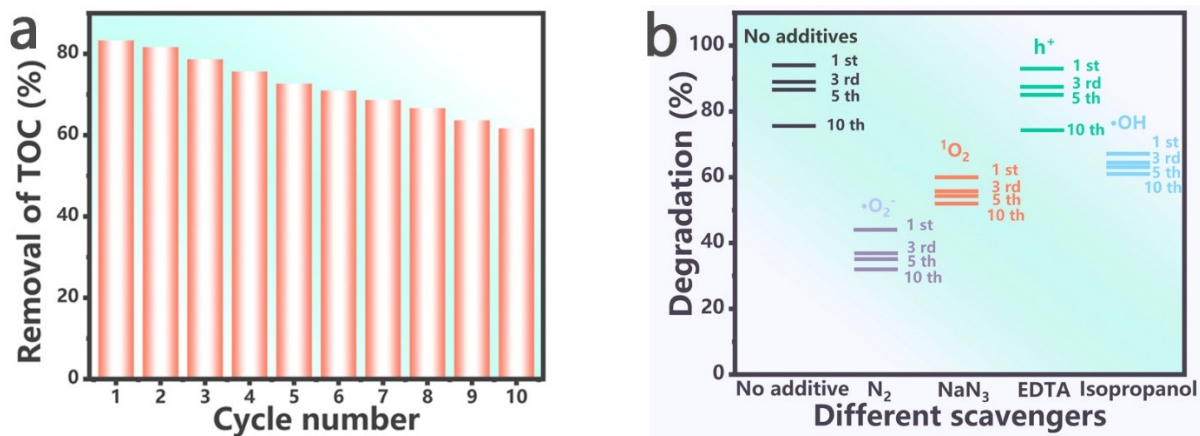

131

132 **Figure S9.** (a) The TOC removal and (b) trapping experiments of reactive species

133 through DNBP degradation process for LP-80 min through different cycle times.

134

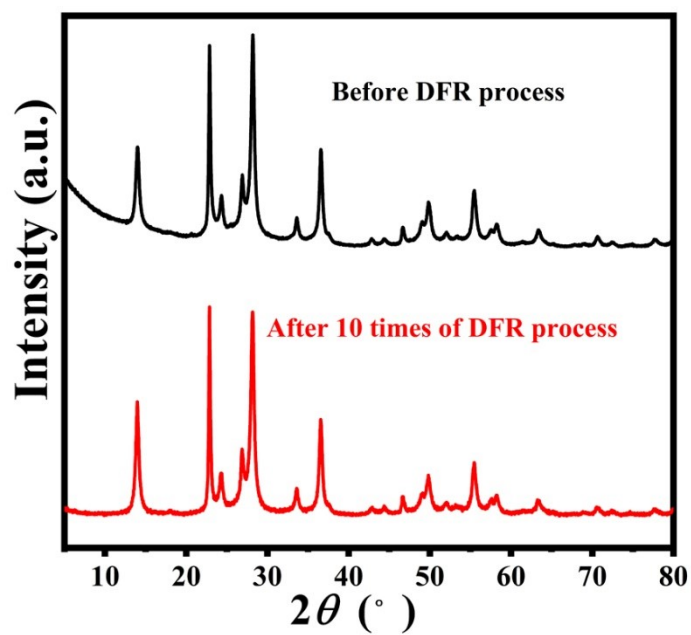

135

136 **Figure S10.** The XRD pattern of illuminated h-WO<sub>3</sub>•0.46H<sub>2</sub>O before and after 10 times

137 of DFR process.

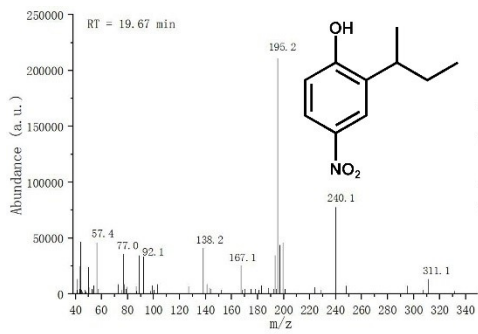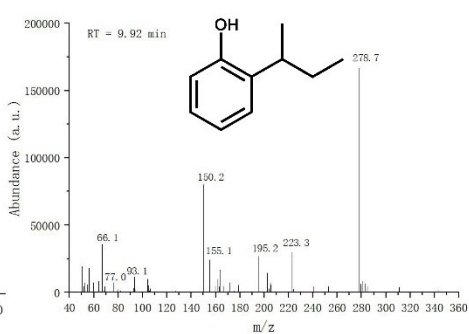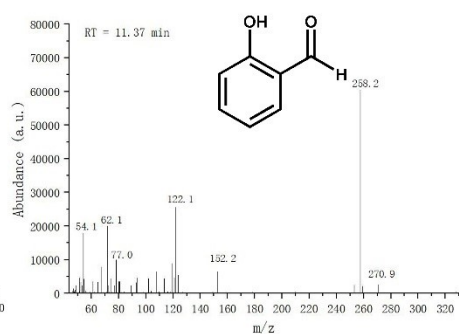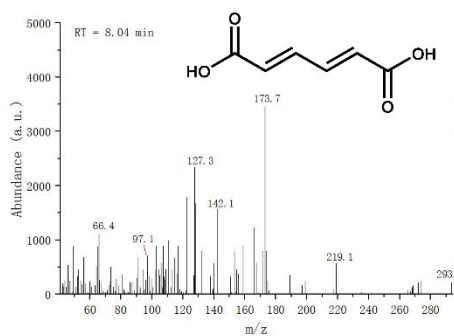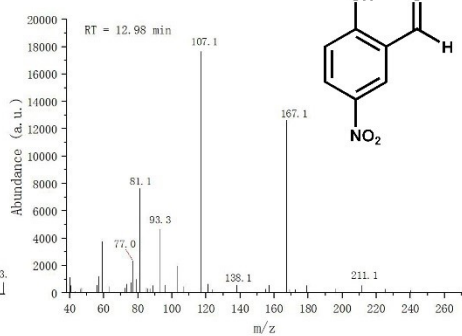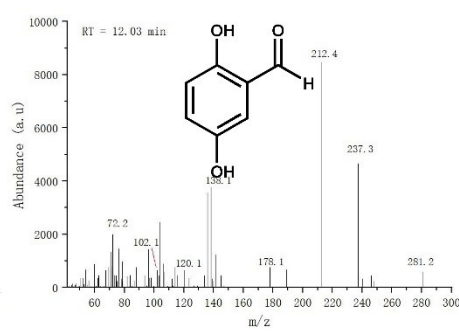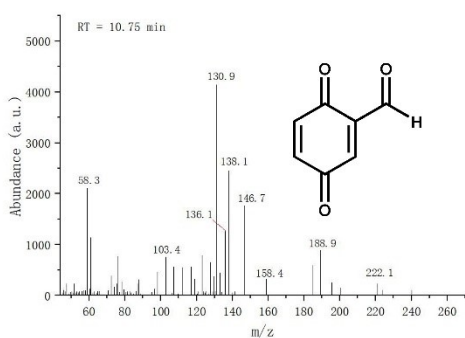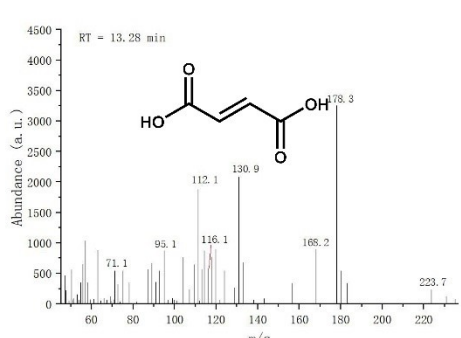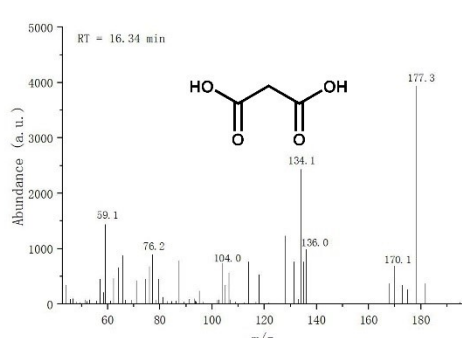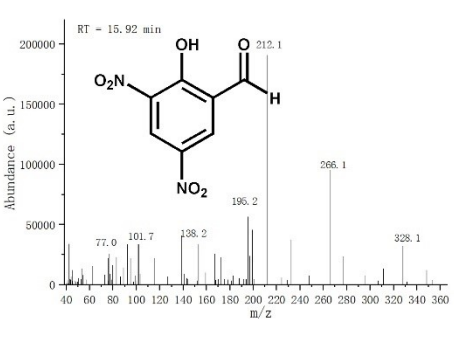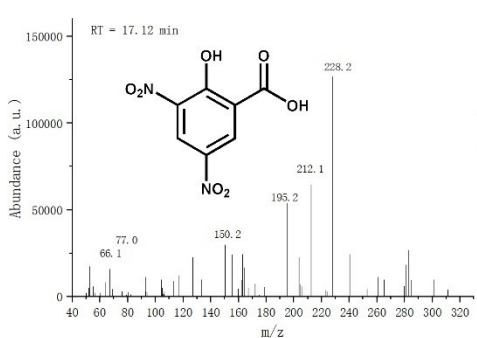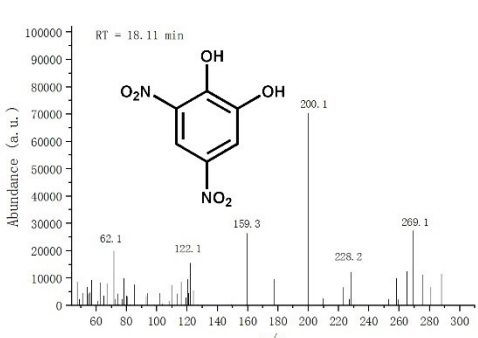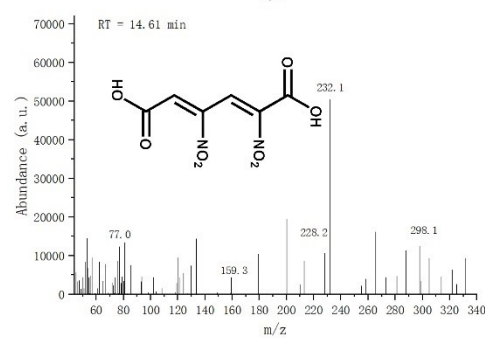

139 **Figure S11.** Mass spectra (MS) of intermediates during the process of DNBP  
140 degradation among illuminated h-WO<sub>3</sub>•0.46H<sub>2</sub>O/H<sub>2</sub>O<sub>2</sub> system.

141

**Table S1.** Different round-the-clock photocatalysts based on stored electrons in WO<sub>3</sub> for organic contaminants degradation under dark condition.

| Photocatalysts                                                  | Pollutants     | Light source           | Illumination reaction time (charging) | Dark reaction time (discharging) | Active species in the dark reaction | References |
|-----------------------------------------------------------------|----------------|------------------------|---------------------------------------|----------------------------------|-------------------------------------|------------|
| Spray dried TiO <sub>2</sub> /WO <sub>3</sub> heterostructure   | Methylene blue | UV                     | 40 min                                | 30 min                           | •OH                                 | 1          |
| WO <sub>3</sub> /TiO <sub>2</sub> hollow microsphere composites | Methyl orange  | Vis                    | 40 min                                | 40 min                           | •OH                                 | 2          |
| Pt: TiO <sub>2</sub> /WO <sub>3</sub> photocatalyst             | Methanol       | Vis                    | 2 h                                   | 6 h                              | •OH                                 | 3          |
| Dual-phase TiO <sub>2</sub> /WO <sub>3</sub>                    | Methanol       | stimulated solar light | 2 h                                   | 6 h                              | •O <sub>2</sub> <sup>-</sup>        | 4          |
| WO <sub>3</sub> /g-C <sub>3</sub> N <sub>4</sub> composite      | Rhodamine B    | Vis                    | 1 h                                   | 8 h                              | •OH                                 | 5          |
| Pt-TiO <sub>2</sub> /WO <sub>3</sub> hybrid material            | Methylene blue | UV/Vis                 | 30 min                                | 60 min                           | •OH                                 | 6          |
| n-MoS <sub>2</sub> /p-WO <sub>3</sub> based diode catalyst      | Methylene blue | -                      | -                                     | -                                | •OH                                 | 7          |
| Mg-ZnO/WO <sub>3</sub> QDs/GO                                   | Rhodamine B    | UV/Vis                 | 6 h                                   | 2 h                              | •O <sub>2</sub> <sup>-</sup>        | 8          |

**Table S2.** Results of the refinement data of h-WO<sub>3</sub>·0.46H<sub>2</sub>O in the Space Group P6/mmm.

|   | Atom | x       | y       | z       | Occupancy | B     | Site | Symmetry |
|---|------|---------|---------|---------|-----------|-------|------|----------|
| 1 | W1   | 0.50000 | 0.00000 | 0.00000 | 1.000     | 1.381 | 3f   | mmm      |
| 2 | O1   | 0.38380 | 0.19190 | 0.00000 | 1.000     | 1.164 | 6l   | mm2      |
| 3 | O2   | 0.50000 | 0.00000 | 0.50000 | 1.000     | 1.858 | 3g   | mmm      |
| 4 | O3   | 0.00000 | 0.00000 | 0.00000 | 0.402     | 2.500 | 1a   | 6/mmm    |
| 5 | O4   | 0.13990 | 0.13990 | 0.20979 | 0.027     | 4.000 | 12n  | ...m     |

**Table S3.** Intermediates of DNBP in illuminated h-WO<sub>3</sub>·0.46H<sub>2</sub>O/H<sub>2</sub>O<sub>2</sub> system.

| The series number of intermediates | Formula                                                     | m/z | Structure                                                                            | Retention time (min) |
|------------------------------------|-------------------------------------------------------------|-----|--------------------------------------------------------------------------------------|----------------------|
| 1                                  | C <sub>7</sub> H <sub>4</sub> N <sub>2</sub> O <sub>6</sub> | 212 | 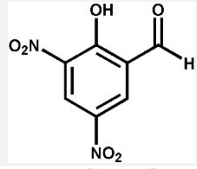 | 15.92                |
| 2                                  | C <sub>7</sub> H <sub>4</sub> N <sub>2</sub> O <sub>7</sub> | 228 |  | 17.12                |
| 3                                  | C <sub>6</sub> H <sub>4</sub> N <sub>2</sub> O <sub>6</sub> | 200 |  | 18.11                |
| 4                                  | C <sub>6</sub> H <sub>4</sub> N <sub>2</sub> O <sub>8</sub> | 232 |  | 14.61                |
| 5                                  | C <sub>10</sub> H <sub>13</sub> NO <sub>3</sub>             | 195 |  | 19.67                |

|    |                 |     |                                                                                      |       |
|----|-----------------|-----|--------------------------------------------------------------------------------------|-------|
| 6  | $C_7H_5NO_4$    | 167 | 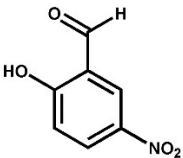   | 12.98 |
| 7  | $C_7H_6O_3$     | 138 |    | 12.03 |
| 8  | $C_7H_4O_3$     | 136 |    | 10.75 |
| 9  | $C_4H_4O_4$     | 116 |    | 13.28 |
| 10 | $C_3H_4O_4$     | 104 |    | 16.34 |
| 11 | $C_{10}H_{14}O$ | 150 |   | 9.92  |
| 12 | $C_7H_6O_2$     | 122 |  | 11.37 |
| 13 | $C_6H_6O_4$     | 142 |  | 8.04  |

### 3. Reference

- [1] H. Khan, M. G. Rigamonti, G. S. Patience, D. C. Boffito, Spray dried TiO<sub>2</sub>/WO<sub>3</sub> heterostructure for photocatalytic applications with residual activity in the dark. *Appl. Catal. B: Environ.*, 2018, **226**, 311-323.
- [2] Y. Li, L. Chen, Y. Guo, X. Sun, Y. Wei, Preparation and characterization of WO<sub>3</sub>/TiO<sub>2</sub> hollow microsphere composites with catalytic activity in dark. *Chem. Eng. J.*, 2012, **181-182**, 734-739.
- [3] M. Mokhtarifar, D. T. Nguyen, M. Sakar, M. Pedferri, M. Asa, R. Kaveh, M. V. Diamanti, T.-O. Do, Mechanistic insights into photogenerated electrons store-and-discharge in hydrogenated glucose template synthesized Pt: TiO<sub>2</sub>/WO<sub>3</sub> photocatalyst for the round-the-clock decomposition of methanol. *Mater. Res. Bull.*, 2021, **137**, 111203.
- [4] M. Mokhtarifar, D. T. Nguyen, M. V. Diamanti, R. Kaveh, M. Asa, M. Sakar, M. Pedferri, T.-O. Do, Fabrication of dual-phase TiO<sub>2</sub>/WO<sub>3</sub> with post-illumination photocatalytic memory. *New. J. Chem.*, 2020, **44**, 20375-20386.
- [5] J. Du, Z. Wang, Y. Li, R. Li, X. Li, K. Wang, Establishing WO<sub>3</sub>/g-C<sub>3</sub>N<sub>4</sub> Composite for “Memory” Photocatalytic Activity and Enhancement in Photocatalytic Degradation. *Catal. Lett.*, 2019, **149**, 1167-1173.
- [6] H. Khan, M. G. Rigamonti, D. C. Boffito, Enhanced photocatalytic activity of Pt-TiO<sub>2</sub>/WO<sub>3</sub> hybrid material with energy storage ability. *Appl. Catal. B: Environ.*, 2019, **252**, 77-85.
- [7] W. L. Kebede, D.-H. Kuo, K. E. Ahmed, H. Abdullah, Dye degradation over the multivalent charge- and solid solution-type n-MoS<sub>2</sub>/p-WO<sub>3</sub> based diode catalyst under dark condition with a self-supporting charge carrier transfer mechanism. *Adv. Powder. Technol.*, 2020, **31**, 2629-2640.

[8] H. Zhao, Q. Fang, C. Chen, Z. Chao, Y. Tsang, Y. Wu, WO<sub>3</sub> Quantum Dots Decorated GO/Mg-doped ZnO Composites for Enhanced Photocatalytic Activity under Nature Sunlight. *Appl. Organomet. Chem.*, 2018, **32**, e4449.
